# 1 ToxVec: Deep Language Model-Based 2 Representation Learning for Venom Peptide 3 Classification

4 Meisam Ahmadi<sup>1</sup>, Mohammad Reza Jahed-Motlagh<sup>1,\*</sup>, Ehsaneddin  
5 Asgari<sup>2</sup>, Adel Torkaman Rahmani<sup>1</sup>, and Alice C. McHardy<sup>2,\*</sup>

6 <sup>1</sup>Department of Computer Engineering, Iran University of Science and Technology,  
7 Tehran, Iran

8 <sup>2</sup>Computational Biology of Infection Research, Helmholtz Center for Infection Research,  
9 38124 Braunschweig, Germany

10 Corresponding author:

11 Mohammad Reza Jahed-Motlagh and Alice McHardy<sup>1,\*</sup>

12 Email address: jahedmr@iust.ac.ir **AND** Alice.McHardy@helmholtz-hzi.de

## 13 ABSTRACT

14 Venom is a mixture of substances produced by a venomous organism aiming at preying, defending,  
15 or intraspecific competing resulting in certain unwanted conditions for the target organism. Venom  
16 sequences are a highly divergent class of proteins making their machine learning-based and  
17 homology-based identification challenging. Prominent applications in drug discovery and healthcare,  
18 while having scarcity of annotations in the protein databases, made automatic identification of venom an  
19 important protein informatics task. Most of the existing machine learning approaches rely on engineered  
20 features, where the predictive model is trained on top of those manually designed features. Recently,  
21 transfer learning and representation learning resulted in significant advancements in many machine  
22 learning problem settings by automatically learning the essential features. This paper proposes an  
23 approach, called ToxVec, for automatic representation learning of protein sequences for the task of  
24 venom identification. We show that pre-trained language model-based representation outperforms the  
25 existing approaches in terms of the F1 score of both positive and negative classes achieving a macro-F1  
26 of 0.89. We also show that an ensemble classifier trained over multiple training sets constructed from  
27 multiple down-samplings of the negative class instances can substantially improve a macro-F1 score to  
28 0.93, which is 7 percent higher than the state-of-the-art performance.

29 **Availability:** The ToxVec application is available to use at <https://github.com/meahmadi/ToxVec>

## 31 1 INTRODUCTION

32 Venom is a mixture of enzymatic or non-enzymatic substances produced by the body of a venomous  
33 organism aiming at preying, defending, or intraspecific competing (Casewell et al., 2013) resulting  
34 in immobilizing or paralyzing the target organism. Venom has evolved independently multiple times  
35 throughout the tree of life, making the evolutionary study of venom a significant interest (Jenner et al.,  
36 2019). Being rich in having ion channels, G-protein-coupled receptors, and transporters have made  
37 venom an excellent source for therapeutics and drug discoveries (Lewis and Garcia, 2003; Prashanth et al.,  
38 2017). Despite prominent applications of venom in drug discovery and healthcare, only a small portion of  
39 proteins are annotated in large protein databases (UniProt/SwissProt) to be venom (Jungo et al., 2012)  
40 (Currently, 6,736 out of 563,082 protein sequences in Swiss-Prot). This gap motivates computational  
41 methods that can automatically and accurately identify venom peptides in the large protein datasets. The  
42 prediction of venoms versus non-venom sequences is not a trivial task protein classification task, where  
43 the use of BLAST-based approaches is challenging: venoms are often (i) evolved from non-toxic proteins

44 (Hargreaves et al., 2014), (ii) and then have highly diverged (Linial et al., 2017). Several studies have  
45 proposed computational and machine learning-based methods for predicting or analyzing toxin/venom  
46 peptides (Cole and Brewer, 2019; Dao et al., 2017; Gacesa et al., 2016; Naamati et al., 2009; Ojeda et al.,  
47 2018; Pan et al., 2020; Wong et al., 2013). In the following, we summarize some of the recent machine  
48 learning supervised methods proposed for venom identification with available software/working servers  
49 which we could compare with our proposed ToxVec.

50 **ClanTox** (Naamati et al., 2009) is a machine learning-based classification of venom available as a  
51 web-server. In the ClanTox, each sequence is encoded into a vector of 545 global sequence features  
52 and the predictive model consisting of 10 boosted-stump classifiers is trained over the dataset of known  
53 venoms (Iba and Langley, 1992) scoring venoms on a scale of -1 to 1. **ToxClassifier** (Gacesa et al.,  
54 2016) is an ensemble predictor using nine Support Vector Machine (SVM) (Cortes and Vapnik, 1995),  
55 Gradient Boosted Machine (GBM) (Friedman, 2002) and Generalised Linear Model (GLM) (Nelder  
56 and Wedderburn, 1972) classifiers over different combinations of features including sequence length,  
57 frequency of amino acids, amino acid dimer frequency, Hidden Markov Models (HMM) of tox-bit motifs  
58 (Starcevic et al., 2015), homology-based features (against a positive venom database). **Toxify** (Cole and  
59 Brewer, 2019) is a deep learning-based venom predictor employing Recurrent Neural Networks (RNN)  
60 and, in particular, the Gated Recurrent Units (GRUs) variation of RNN (Cho et al., 2014) for sequence  
61 modeling and ultimately prediction. For sequence encoding, toxify uses five Atchley factors per amino  
62 acid in the protein (Atchley et al., 2005). Similarly, in this paper, we propose a deep-learning approach for  
63 supervised training of the venom predictor model. However, instead of using manually extracted features,  
64 we propose a transfer learning framework. Similar to ProtVec (Asgari and Mofrad, 2015) and ProtVecX  
65 (Asgari, 2019; Asgari et al., 2019a), we use a skip-gram network (Bojanowski et al., 2017; Mikolov et al.,  
66 2013) which is analogous to language modeling. Subsequently, the pretrained network is fine-tuned for  
67 the venom classification task.

68 Recently, transfer learning resulted in significant advancements in many machine learning problem  
69 settings, particularly for inadequately annotated data (Bengio, 2012; Tan et al., 2018; Wolf et al., 2019).  
70 Transfer learning in machine learning refers to the use of the solution in a problem setting (source problem)  
71 with enough training samples/prior knowledge to solve a different problem (target problem) with less  
72 training samples/prior knowledge. Using a neural network trained relevant representations for a specific  
73 task for another task is also an instance of transfer learning through representation learning (Bengio, 2012;  
74 Tan et al., 2018). Combinations of being self-supervised and being general enough make neural language  
75 modeling an ideal candidate for transfer learning on the sequential data (Howard and Ruder, 2018).  
76 Afterward, the trained language modeling network can be fine-tuned for any particular task, even when  
77 only a limited number of annotations are available. Here we describe the use of Skip-gram (Bojanowski  
78 et al., 2017; Mikolov et al., 2013), one of the most successful architecture to perform transfer learning on  
79 natural language text for the task of venom prediction.

80 This paper shows that fine-tuning of language model-based representation outperforms the state-of-  
81 the-art approaches in venom peptide classification. In addition, ensemble classifiers trained on resamples  
82 of negative samples (the major class) further improve the macro-F1 of both negative and positive classes.

## 83 METHODS

### 84 1.1 Datasets

85 For the ease of benchmarking, we use the dataset created and proposed by Toxify (Cole and Brewer, 2019)  
86 containing training and test protein sequences:

87  
88 The Toxify training dataset contains (i) **Positive examples:** 6,133 venom protein sequences extracted  
89 from Swiss-Prot sequences annotated with *annotation:(type: tissue specificity venom)*, (i) **Negative**  
90 **examples:** 50,000 random protein sequences from Swiss-Prot satisfying the query *NOT annotation:(type:*  
91 *tissue specificity venom)*, these sequences only include the sequences uploaded prior to June 2016 on  
92 Swiss-Prot.

93  
94 The Toxify test dataset contains 274 verified venom protein sequences (2016–2018, not included in the  
95 training) and 94 verified non-venom protein sequences from the same time interval of (2016–2018).

## 1.2 Skip-gram analogous to Language Modeling

Language modeling aims to assign a probability  $P(w_1, w_2, \dots, w_N)$  to a given sequence of elements (words, phrases, or amino acids in proteins)  $w_1, w_2, \dots, w_N$ . Language modeling is a vital component in many language processing applications, particularly the applications containing language generation or the evaluation of text correctness, e.g., chat-bot or machine translation. Language modeling probability can be written as follows using the chain rule:

$$P(w_1, w_2, \dots, w_N) = P(w_1) \times P(w_2|w_1) \times P(w_3|w_1, w_2) \times \dots \times P(w_N|w_1, \dots, w_{N-1})$$

Requiring only raw data and being general enough has made language modeling a favorable task for transfer learning. Recently, transfer learning from the language modeling became a very popular method in natural language processing and bioinformatics and obtained state-of-the-art performance in many tasks (Asgari and Mofrad, 2015; Bengio, 2012; Howard and Ruder, 2018; Rao et al., 2019; Tan et al., 2018). A variety of language models are proposed in the literature. In this paper, we focus on Skip-gram neural network (depicted in Figure 1.1) whose objective is analogous to the objective of the language modeling task. However, in skip-gram the input and output are swapped and it predicts the surroundings (context) for a given textual unit. The objective of skip-gram is to maximize the following log-likelihood:

$$\sum_{t=1}^M \sum_{c \in [t-N, t+N]} \log p(w_c | w_t), \quad (1)$$

where  $N$  is the surrounding window size around word  $w_t$ ,  $c$  is the context indices around index  $t$ , and  $M$  is the corpus size in terms of the number of available words and context pairs. This probability of observing a context word  $w_c$  given  $w_t$  is parameterized using word embedding:

$$p(w_c | w_t; \theta) = \frac{e^{v_c \cdot v_t}}{\sum_{c' \in \mathcal{C}} e^{v_{c'} \cdot v_t}}, \quad (2)$$

where  $\mathcal{C}$  denotes all existing contexts in the training data. However, iterating over all existing contexts is computationally expensive. This issue can be efficiently addressed by using negative sampling. In a negative sampling framework, we can rewrite Equation 1 as follows:

$$\sum_{t=1}^T \left[ \sum_{c \in [t-N, t+N]} \log \left( 1 + e^{-s(w_t, w_c)} \right) + \sum_{w_r \in \mathcal{N}_{t,c}} \log \left( 1 + e^{s(w_t, w_r)} \right) \right], \quad (3)$$

where  $\mathcal{N}_{t,c}$  denotes a set of randomly selected negative examples sampled from the vocabulary collection as non-contexts of  $w_t$  and  $s(w_t, w_c) = v_t^\top \cdot v_c$  (parameterization with the word vector  $v_t$  and the context vector  $v_c$ ) (Goldberg and Levy, 2014). The use of Skip-gram for protein sequences and transfer learning in protein informatics has been proposed by a number of recent works (Asgari et al., 2019a; Asgari and Mofrad, 2015; Wan and Zeng, 2016).

## 1.3 Overview of Approach

Here we describe our approach ToxVec in the use of language-model based representation for the classification of venom peptides. The ToxVec computational workflow has the following steps (as depicted in Figure 1):

**1. Unsupervised Training of the Language Model-based Embeddings:** In this step (Figure 1.1), we train a protein k-mer representation proposed in (Asgari and Mofrad, 2015), ProtVec. For this study, we used a recent version of ProtVec where the training is expanded from Swiss-Prot (containing  $\approx 500K$  sequences) to a much larger set, UniRef90, containing  $\approx 115M$  protein sequences. Next, the protein sequences are divided into non-overlapping 3-mers by adding two starting symbols of ## and two ending symbols of @@. As detailed in (Asgari and Mofrad, 2015) and also shown in Figure 1, all three ways of splitting (based on the starting position for splitting) is done (i) to increase the training size to

133  $\approx 115M \times 3 = 445M$  sequences of k-mers and (ii) to capture all possible neighborhoods. The skip-gram  
 134 network is trained on the mentioned collection of divided sequences, with the window size of 20, and the  
 135 vector size of 3000.  
 136

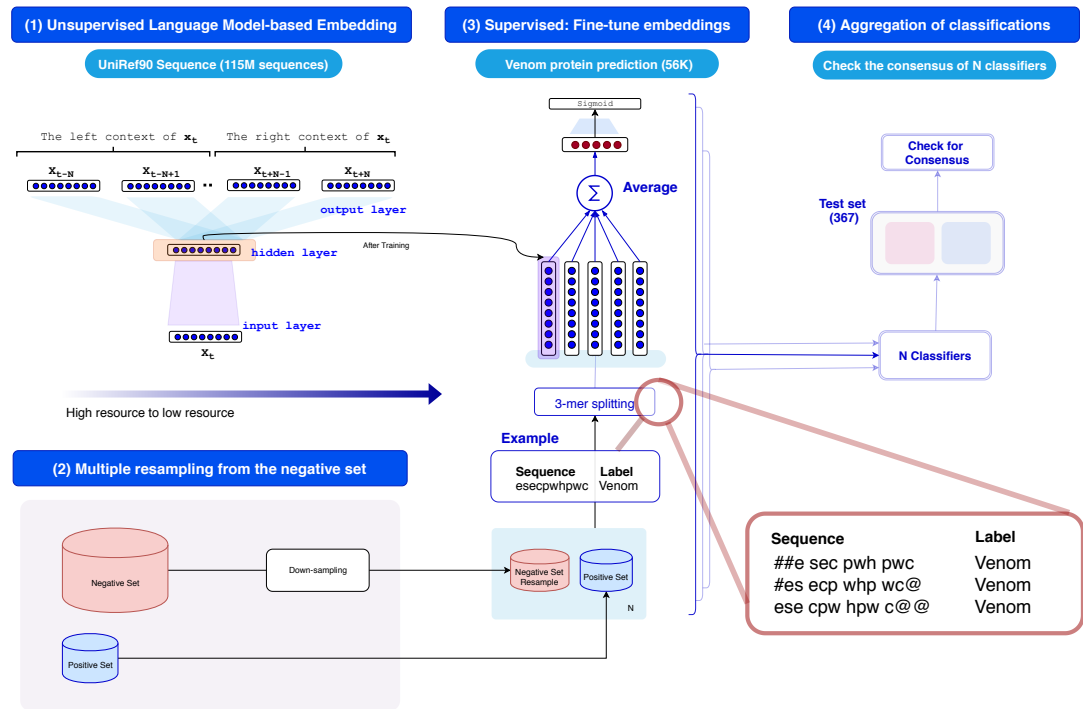

**Figure 1.** Overview of the ToxVec approach for the detection of venom proteins using fine-tuning of language model-based representations. The steps are detailed in the §1.3. (1) The first step is the training of Skip-gram embedding for protein k-mers over UniRef90, (2) We draw multiple ( $N=10$ ) resamples from the major class (negative set), (3) We fine-tune the Skip-gram embeddings for the venom classification in the classification network, (4) The eventual output is the aggregated result from ( $N = 10$  classifiers).

137 **2. Multiple Resampling from the Major Class (negative)** Since in the training dataset provided by  
 138 (Cole and Brewer, 2019), the negative set is almost eight times larger than the positive set, the classifier is  
 139 subject to be biased towards the negative class. To address this issue, we downsample the negative set to  
 140 the positive set's size to mitigate this bias. In addition, next, to ensure the use of more negative samples,  
 141 we perform  $N$  resamplings of the negative set and subsequently train  $N$  classifiers ( $N=10$ ).

142  
 143 **3. Supervised Fine-tuning of Embeddings for the Venom Classification** For each resampled training  
 144 set (in step 2), we train a classification network in the next step. As classification model, we used  
 145 the *fasttext* model (Bojanowski et al., 2017), a simple but effective model for sentence classification  
 146 in NLP: the input embeddings (here k-mer embedding) are averaged followed by a feedforward layer  
 147 before the ending sigmoid layer produces the class conditional probabilities. For the k-mer embedding  
 148 of the input sequences, we use the ProtVec embeddings detailed in the 1<sup>st</sup> step. We fine-tune the k-  
 149 mers embedding in the course of supervised training. To investigate the role of pretrained ProtVec  
 150 in classification performance, we repeat the same experiment with randomly initialized k-mer embedding.

151 Furthermore, since in the creation of embedding training corpus (step 1), each protein sequence  
 152 is divided into three sequences of k-mers ( $k=3$ ), the test set sequences would also undergo the same  
 153 procedure. Thus, at the inference time, for each test sequence, we would have three possible segmentations  
 154 (e.g., esecpwhpwc  $\rightarrow$  (1) ##e, sec, pwh, pwc (2) #es, ecp, whp, wc@ (3) ese, cpw, hpw, c@@) and  
 155 subsequently we would have three classification outcomes. This way, we have three binary outcomes for

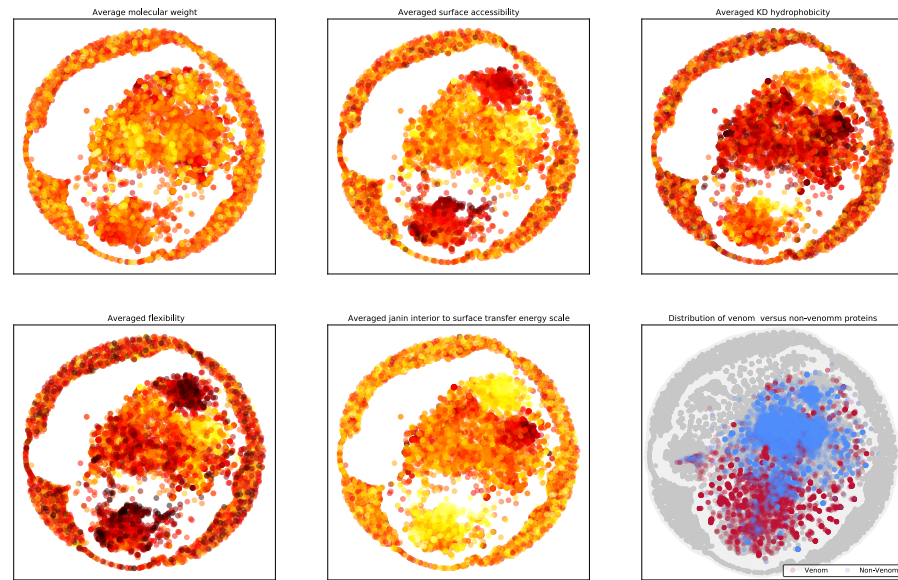

**Figure 2.** Distribution of biophysical and biochemical properties in the protein trimers (except (f)) and in venom sequences versus non-venoms (f) in the embedding space visualized using t-SNE. The five heatmaps scatter plots of biophysical properties (Figures (a) to (e)) show the standardized scales averaged for each trimer. Figure (f) shows the distribution of training instances of venom (colored in red) versus non-venom (colored in blue) in this space.

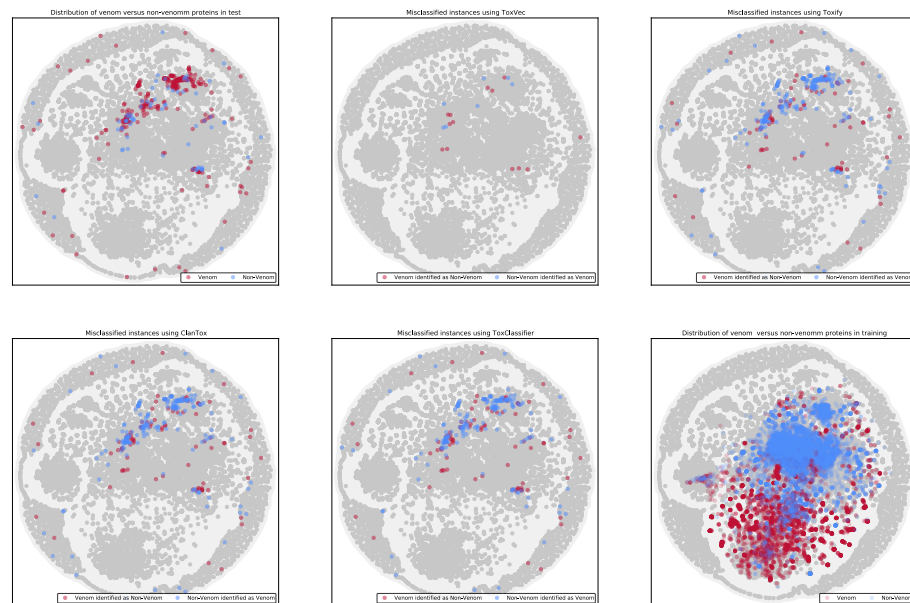

**Figure 3.** Visualization of test (a), train (f), and misclassified instances ((b) to (e)) using different existing venom predictive models in the embedding space of protein k-mers (trimers) for venom prediction. The ToxVec (b), Toxify (c), ClanTox (d), ToxClassifier (e), and ToxVec misclassified instances are compared. In Figures (a) and (f), the red points are venom sequences and the blue points indicate the non-venom sequences. In Figures (b) to (e), the red points indicate the venom sequences identified as non-venom by the predictor and the blue points are the non-venom sequences identified as venom sequences.

156 each protein sequence in the test set, and we assign the majority class for each sequence.



157

158 **4. The ensemble classifier of different resamples** As discussed in step 2, we create  $N = 10$  training sets  
159 resulting in 10 predictive models. We consider a positive sample for the eventual classification output if  
160 and only if all 10 models confirm this.

## 161 2 RESULTS

162 Venom Protein classification results over the Toxify test set for *ToxVec*, *Toxify*, *ToxClassifier*, and  
163 *ClanTox* are provided in Table 1. For the evaluation, the accuracy, the F1 score of positive and negative  
164 classes, and their average (macro-F1) are reported. Our *ToxVec* outperformed *ClanTox*, *ToxClassifier*,  
165 and *Toxify* in terms of F1 on both positive and negative class by improving macro-F1 (average of F1  
166 on positive and negative classes) for 3 percent from 0.86 to 0.89. Furthermore, the incorporation of  
167 negative-set resamplings increased the performance to a macro-F1 of 0.93.

**Table 1.** The summary of evaluation results for detecting venom proteins in the Toxify test set: We compare the performance of where *ToxVec* and its ensemble version with *ClanTox*, *ToxClassifier*, and *Toxify* approaches in terms of accuracy, F1s of both positive and negative classes, and the macro-average of F1s. The performance of *ToxVec* for both initialization modes (random initialization and ProtVec-based initialization) are provided.

| Method                                         | Accuracy    | F1-positive | F1-negative | macro-F1    |
|------------------------------------------------|-------------|-------------|-------------|-------------|
| ClanTox                                        | 0.79        | 0.84        | 0.69        | 0.77        |
| ToxClassifier                                  | 0.73        | 0.78        | 0.65        | 0.72        |
| Toxify                                         | 0.86        | 0.85        | 0.87        | 0.86        |
| <i>ToxVec(Random – init – Emb)</i>             | 0.9         | 0.82        | 0.93        | 0.88        |
| <i>ToxVec – Ensembled(Random – init – Emb)</i> | 0.94        | 0.87        | 0.96        | 0.92        |
| <i>ToxVec(UniRef90 – Emb)</i>                  | 0.91        | 0.84        | 0.94        | 0.89        |
| <i>ToxVec – Ensembled(UniRef90 – Emb)</i>      | <b>0.95</b> | <b>0.89</b> | <b>0.96</b> | <b>0.93</b> |

168 We created a t-SNE (Maaten and Hinton, 2008) visualization of the Skip-gram embedding space of  
169 protein trimers (Figure 2). In this figure, the trimers of vector size 3000 are mapped into a 2D space. Next,  
170 to see how biophysical properties are distributed in this embedding space we color the k-mers for different  
171 properties, including mean molecular weight, mean surface accessibility (Emini et al., 1985), mean KD  
172 hydrophilicity (Kyte and Doolittle, 1982), mean flexibility (Vihinen et al., 1994), and mean Janin Interior  
173 to surface transfer energy scale (Janin et al., 1988). The mentioned biophysical scales are standardized  
174 (zero mean and unit variance) to be comparable. Higher intensity (lighter color) indicates being higher in  
175 the scales. We can see that the k-mers of similar properties are close in the embedding space. Afterward,  
176 we represent Toxify’s training instances with the average of their overlapping trimers and then mapped  
177 them to the 2D space using the same t-SNE projection of simple trimers. The bottom-right sub-figure  
178 in Figure 2 shows the venom sequences in red and the non-venoms in blue. Comparison of training  
179 instances and the biophysical properties shows the average properties of typical venom sequences versus  
180 non-venom protein sequences. The illustration shows that the venoms are diverse in terms of averaged  
181 biophysical properties, which is confirmed previously even within certain snake families (Nawarak et al.,  
182 2003).

## 183 CONCLUSIONS AND DISCUSSIONS

184 Here, we described ToxVec, a deep learning model using language model-based representation learning  
185 of proteins for venom protein identification. We compared the performance of ToxVec with recent super-  
186 vised approaches in venom identification and showed that the supervised fine-tuning of protein language  
187 model-based representation achieved state-of-the-art performance in this task. We also addressed the  
188 class-imbalance problem in training a predictive model by ensembling models trained on the major class’s  
189 downsampling, further improving the performance by 4 percent macro F1 (a macro-F1 of 0.93).

190  
191 Figure 3 showed the visualization of test cases (a), train cases (f), and the misclassified instances  
192 using different approaches. The figure suggests that the test cases were not similar to the typical training  
193 instances, and the problem has not been trivial for the embedding space. The misclassified instances of

194 Toxify, ToxClassifier, and ClanTox follow the same patterns. When ToxVec was employed, the F1 scores  
195 on both venoms/non-venoms classes were improved, which was even better in the negative class.

196 We observed that the *ToxVec* outperformed the state-of-the-art venom predictors by 2% to 7% macro-  
197 F1 (averaged F1 in the positive and negative class). The minimum macro-F1 of *ToxVec*, 0.88, which  
198 was still higher than existing approaches macro-F1 (0.86), was achieved when an embedding layer was  
199 trained for k-mers from scratch in a supervised manner. By ensembling ten classifiers trained on different  
200 downsampling of the negative set, this performance increased to a macro-F1 of 0.92. We also showed  
201 that when the pretrained Skip-grams over UniRed are used, the macro-F1 and all scores are increased  
202 by one more point (macro-F1 = 0.93). These results suggest that automatic feature learning, either  
203 by random initialization and then supervised training or fine-tuning of self-supervised embedding, can  
204 improve venom identification performance compared to methods using manual feature engineering. Like  
205 natural language processing scenarios, fine-tuning of language model-based representations improved the  
206 downstream supervised task performance, which is particularly evident for small training sets. The success  
207 of automatic representation learning approaches in our experiments motivates exploring of contextualized  
208 embedding (transformers (Rao et al., 2019) or ELMo embeddings (Asgari et al., 2019b; Heinzinger et al.,  
209 2019)) as future directions.

## 210 REFERENCES

- 211 Asgari, E. (2019). *Life Language Processing: Deep Learning-based Language-agnostic Processing of*  
212 *Proteomics, Genomics/Metagenomics, and Human Languages*. PhD thesis, UC Berkeley.
- 213 Asgari, E., McHardy, A. C., and Mofrad, M. R. (2019a). Probabilistic variable-length segmentation of  
214 protein sequences for discriminative motif discovery (dimotif) and sequence embedding (protvecx).  
215 *Scientific reports*, 9(1):1–16.
- 216 Asgari, E. and Mofrad, M. R. (2015). Continuous distributed representation of biological sequences for  
217 deep proteomics and genomics. *PloS One*, 10(11):e0141287.
- 218 Asgari, E., Poerner, N., McHardy, A., and Mofrad, M. (2019b). Deeprime2sec: Deep learning for protein  
219 secondary structure prediction from the primary sequences. *bioRxiv*, page 705426.
- 220 Atchley, W. R., Zhao, J., Fernandes, A. D., and Drüke, T. (2005). Solving the protein sequence metric  
221 problem. *Proceedings of the National Academy of Sciences*, 102(18):6395–6400.
- 222 Bengio, Y. (2012). Deep learning of representations for unsupervised and transfer learning. In *Proceedings*  
223 *of ICML workshop on unsupervised and transfer learning*, pages 17–36.
- 224 Bojanowski, P., Grave, E., Joulin, A., and Mikolov, T. (2017). Enriching word vectors with subword  
225 information. *Transactions of the Association for Computational Linguistics*, 5:135–146.
- 226 Casewell, N. R., Wüster, W., Vonk, F. J., Harrison, R. A., and Fry, B. G. (2013). Complex cocktails: the  
227 evolutionary novelty of venoms. *Trends in ecology & evolution*, 28(4):219–229.
- 228 Cho, K., van Merriënboer, B., Gulcehre, C., Bahdanau, D., Bougares, F., Schwenk, H., and Bengio, Y.  
229 (2014). Learning phrase representations using RNN encoder–decoder for statistical machine translation.  
230 In *Proceedings of the 2014 Conference on Empirical Methods in Natural Language Processing*  
231 *(EMNLP)*, pages 1724–1734, Doha, Qatar. Association for Computational Linguistics.
- 232 Cole, T. J. and Brewer, M. S. (2019). Toxify: a deep learning approach to classify animal venom proteins.  
233 *PeerJ*, 7:e7200.
- 234 Cortes, C. and Vapnik, V. (1995). Support-vector networks. *Machine learning*, 20(3):273–297.
- 235 Dao, F.-Y., Yang, H., Su, Z.-D., Yang, W., Wu, Y., Hui, D., Chen, W., Tang, H., and Lin, H. (2017). Recent  
236 advances in conotoxin classification by using machine learning methods. *Molecules*, 22(7):1057.
- 237 Emini, E. A., Hughes, J. V., Perlow, D., and Boger, J. (1985). Induction of hepatitis a virus-neutralizing  
238 antibody by a virus-specific synthetic peptide. *J. Virology*, 55(3):836–839.
- 239 Friedman, J. H. (2002). Stochastic gradient boosting. *Computational statistics & data analysis*, 38(4):367–  
240 378.
- 241 Gacesa, R., Barlow, D. J., and Long, P. F. (2016). Machine learning can differentiate venom toxins from  
242 other proteins having non-toxic physiological functions. *PeerJ Computer Science*, 2:e90.
- 243 Goldberg, Y. and Levy, O. (2014). word2vec explained: deriving mikolov et al.’s negative-sampling  
244 word-embedding method. *arXiv preprint arXiv:1402.3722*.
- 245 Hargreaves, A. D., Swain, M. T., Hegarty, M. J., Logan, D. W., and Mulley, J. F. (2014). Restriction and  
246 recruitment—gene duplication and the origin and evolution of snake venom toxins. *Genome biology*  
247 *and evolution*, 6(8):2088–2095.

- 248 Heinzinger, M., Elnaggar, A., Wang, Y., Dallago, C., Nechaev, D., Matthes, F., and Rost, B. (2019). Mod-  
249 eling aspects of the language of life through transfer-learning protein sequences. *BMC bioinformatics*,  
250 20(1):723.
- 251 Howard, J. and Ruder, S. (2018). Universal language model fine-tuning for text classification. In  
252 *Proceedings of the 56th Annual Meeting of the Association for Computational Linguistics (Volume 1:  
253 Long Papers)*, pages 328–339, Melbourne, Australia. Association for Computational Linguistics.
- 254 Iba, W. and Langley, P. (1992). Induction of one-level decision trees. In *Machine Learning Proceedings  
255 1992*, pages 233–240. Elsevier.
- 256 Janin, J., Miller, S., and Chothia, C. (1988). Surface, subunit interfaces and interior of oligomeric proteins.  
257 *Journal of molecular biology*, 204(1):155–164.
- 258 Jenner, R. A., von Reumont, B. M., Campbell, L. I., and Undheim, E. A. B. (2019). Parallel Evolution  
259 of Complex Centipede Venoms Revealed by Comparative Proteotranscriptomic Analyses. *Molecular  
260 Biology and Evolution*, 36(12):2748–2763.
- 261 Jungo, F., Bougueleret, L., Xenarios, I., and Poux, S. (2012). The uniprotkb/swiss-prot tox-prot program:  
262 a central hub of integrated venom protein data. *Toxicon*, 60(4):551–557.
- 263 Kyte, J. and Doolittle, R. F. (1982). A simple method for displaying the hydrophobic character of a protein.  
264 *J. Mol. Biol.*, 157(1):105–132.
- 265 Lewis, R. J. and Garcia, M. L. (2003). Therapeutic potential of venom peptides. *Nature reviews drug  
266 discovery*, 2(10):790–802.
- 267 Linal, M., Rappoport, N., and Ofer, D. (2017). Overlooked short toxin-like proteins: a shortcut to drug  
268 design. *Toxins*, 9(11):350.
- 269 Maaten, L. v. d. and Hinton, G. (2008). Visualizing data using t-sne. *Journal of machine learning research*,  
270 9(Nov):2579–2605.
- 271 Mikolov, T., Sutskever, I., Chen, K., Corrado, G. S., and Dean, J. (2013). Distributed representations of  
272 words and phrases and their compositionality. In *Advances in neural information processing systems*,  
273 pages 3111–3119.
- 274 Naamati, G., Askenazi, M., and Linal, M. (2009). Clantox: a classifier of short animal toxins. *Nucleic  
275 acids research*, 37(suppl\_2):W363–W368.
- 276 Nawarak, J., Sinchaikul, S., Wu, C.-Y., Liao, M.-Y., Phutrakul, S., and Chen, S.-T. (2003). Proteomics of  
277 snake venoms from elapidae and viperidae families by multidimensional chromatographic methods.  
278 *Electrophoresis*, 24(16):2838–2854.
- 279 Nelder, J. A. and Wedderburn, R. W. (1972). Generalized linear models. *Journal of the Royal Statistical  
280 Society: Series A (General)*, 135(3):370–384.
- 281 Ojeda, P. G., Ramírez, D., Alzate-Morales, J., Caballero, J., Kaas, Q., and González, W. (2018). Compu-  
282 tational studies of snake venom toxins. *Toxins*, 10(1):8.
- 283 Pan, X., Zuallaert, J., Wang, X., Shen, H.-B., Campos, E. P., Marushchak, D. O., and De Neve, W. (2020).  
284 Toxdl: Deep learning using primary structure and domain embeddings for assessing protein toxicity.  
285 *Bioinformatics*.
- 286 Prashanth, J. R., Hasaballah, N., and Vetter, I. (2017). Pharmacological screening technologies for venom  
287 peptide discovery. *Neuropharmacology*, 127:4–19.
- 288 Rao, R., Bhattacharya, N., Thomas, N., Duan, Y., Chen, P., Canny, J., Abbeel, P., and Song, Y. (2019).  
289 Evaluating protein transfer learning with tape. In *Advances in Neural Information Processing Systems*,  
290 pages 9689–9701.
- 291 Starcevic, A., Moura-da Silva, A. M., Cullum, J., Hranueli, D., and Long, P. F. (2015). Combinations  
292 of long peptide sequence blocks can be used to describe toxin diversification in venomous animals.  
293 *Toxicon*, 95:84–92.
- 294 Tan, C., Sun, F., Kong, T., Zhang, W., Yang, C., and Liu, C. (2018). A survey on deep transfer learning.  
295 In *International conference on artificial neural networks*, pages 270–279. Springer.
- 296 Vihinen, M., Torkkila, E., and Riikonen, P. (1994). Accuracy of protein flexibility predictions. *Proteins*,  
297 19(2):141–149.
- 298 Wan, F. and Zeng, J. M. (2016). Deep learning with feature embedding for compound-protein interaction  
299 prediction. *bioRxiv*, page 086033.
- 300 Wolf, T., Debut, L., Sanh, V., Chaumond, J., Delangue, C., Moi, A., Cistac, P., Rault, T., Louf, R.,  
301 Funtowicz, M., et al. (2019). Huggingface’s transformers: State-of-the-art natural language processing.  
302 *ArXiv*, pages arXiv–1910.



303 Wong, E. S., Hardy, M. C., Wood, D., Bailey, T., and King, G. F. (2013). Svm-based prediction of  
304 propeptide cleavage sites in spider toxins identifies toxin innovation in an australian tarantula. *PLoS*  
305 *One*, 8(7):e66279.
